# Supplementary material
Source: publisher figshare collection journal article supplement (https://gsajournals.figshare.com/ndownloader/files/15051719)
Supplement: Supplementary file 1 [file 15051719]

## Sheet: Table Note 2b_SuppInfo
Table Note 2b_SuppInfo. Enriched GO terms identified in overrepresented genes in trametinib-treated versus vehicle-treated wt melanoma medaka.
Database	Name	ID	fold enrichment; p-val
biological process	cellular protein complex disassembly	GO:0043624	O=4;E=0.54;R=7.36;rawP=0.0021
	macromolecular complex disassembly	GO:0032984	O=4;E=0.63;R=6.30;rawP=0.0037
	response to lithium ion	GO:0010226	O=2;E=0.10;R=19.78;rawP=0.0046
	cellular component disassembly	GO:0022411	O=5;E=1.02;R=4.90;rawP=0.0034
	establishment of protein localization to endoplasmic reticulum	GO:0072599	O=3;E=0.37;R=8.12;rawP=0.0060
	translational termination	GO:0006415	O=3;E=0.32;R=9.46;rawP=0.0039
	striated muscle contraction	GO:0006941	O=3;E=0.30;R=10.01;rawP=0.0033
	cellular macromolecular complex disassembly	GO:0034623	O=4;E=0.62;R=6.48;rawP=0.0033
	muscle cell homeostasis	GO:0046716	O=2;E=0.06;R=33.75;rawP=0.0016
	protein complex disassembly	GO:0043241	O=4;E=0.56;R=7.13;rawP=0.0024
cellular component	extracellular matrix	GO:0031012	O=9;E=1.42;R=6.32;rawP=1.08e-05
	extracellular matrix part	GO:0044420	O=6;E=0.62;R=9.70;rawP=3.45e-05
	proteinaceous extracellular matrix	GO:0005578	O=8;E=1.20;R=6.65;rawP=2.45e-05
	extracellular region part	GO:0044421	O=13;E=3.67;R=3.54;rawP=5.27e-05
	cytosolic ribosome	GO:0022626	O=4;E=0.30;R=13.15;rawP=0.0002
	ribosome	GO:0005840	O=5;E=0.68;R=7.33;rawP=0.0006
	ribosomal subunit	GO:0044391	O=4;E=0.45;R=8.93;rawP=0.0010
	large ribosomal subunit	GO:0015934	O=3;E=0.25;R=11.97;rawP=0.0020
	cytosolic part	GO:0044445	O=4;E=0.63;R=6.40;rawP=0.0035
	collagen	GO:0005581	O=3;E=0.30;R=10.08;rawP=0.0033
molecular function	transferase activity, transferring amino-acyl groups	GO:0016755	O=3;E=0.08;R=38.21;rawP=6.35e-05
	protein-glutamine gamma-glutamyltransferase activity	GO:0003810	O=2;E=0.03;R=67.93;rawP=0.0004
	oxidoreductase activity, acting on CH-OH group of donors	GO:0016614	O=4;E=0.42;R=9.55;rawP=0.0008
	oxidoreductase activity, acting on the CH-OH group of donors, NAD or NADP as acceptor	GO:0016616	O=4;E=0.38;R=10.54;rawP=0.0006
	calcium-dependent cysteine-type endopeptidase activity	GO:0004198	O=2;E=0.05;R=38.21;rawP=0.0012
	structural constituent of ribosome	GO:0003735	O=4;E=0.51;R=7.79;rawP=0.0017
	insulin-like growth factor binding	GO:0005520	O=2;E=0.08;R=24.45;rawP=0.0030
	magnesium ion binding	GO:0000287	O=4;E=0.59;R=6.83;rawP=0.0028
	calcium ion binding	GO:0005509	O=7;E=2.19;R=3.20;rawP=0.0057
	endopeptidase activity	GO:0004175	O=5;E=1.23;R=4.05;rawP=0.0076
